# Supplementary material for: Bioinformatics-Guided Identification of Ethyl Acetate Extract of Citri Reticulatae Pericarpium as a Functional Food Ingredient with Anti-Inflammatory Potential
Source: MDPI journal article supplement (doi:10.3390/molecules27175435), 2022-08-25
Supplement: s1 [file s1]

Table S1 Clusters identified by principal component analysis and K-means clustering

| PC1    | PC2    | PC3    | Name                                                     | Type                   | Cluster in K-means | Labels used in Figure 2 |
|--------|--------|--------|----------------------------------------------------------|------------------------|--------------------|-------------------------|
| -1.098 | -0.719 | 0.415  | Hesperitin                                               | Flavone and Flavonoids | 0                  | I                       |
| -2.079 | -0.325 | 0.34   | Naringenin                                               | Flavone and Flavonoids | 0                  | I                       |
| -1.301 | -0.892 | 0.195  | 5,7-dihydroxy-2-(3-hydroxy-4-methoxyphenyl)chroman-4-one | Flavone and Flavonoids | 0                  | I                       |
| -1.807 | -0.395 | 0.269  | Quercetin                                                | Flavone and Flavonoids | 0                  | I                       |
| -0.047 | -1.151 | -0.185 | Gardenin_B                                               | Polymethoxy flavone    | 0                  | I                       |
| 0.746  | -1.456 | -0.237 | Tangeretin                                               | Polymethoxy flavone    | 0                  | I                       |
| 0.471  | -1.294 | -0.261 | Nobiletin                                                | Polymethoxy flavone    | 0                  | I                       |
| -0.268 | -1.382 | 0.2    | Carvacrol                                                | Aromatic               | 0                  | I                       |
| -0.137 | -0.465 | 0.374  | Vanillin                                                 | Aromatic               | 0                  | I                       |
| 1.483  | -0.451 | 0.675  | 5-hydroxymethyl furfural                                 | Aromatic               | 0                  | I                       |
| 0.663  | -0.165 | 0.47   | Caffeic acid                                             | Aromatic               | 0                  | I                       |
| -0.249 | -0.21  | -0.242 | Isovanillic                                              | Aromatic               | 0                  | I                       |
| 0.229  | -1.15  | -0.098 | Antioxidant No. 33                                       | Aromatic               | 0                  | I                       |
| 1.109  | -1.093 | 0.351  | p-Cymen-8-ol                                             | Aromatic               | 0                  | I                       |
| 1.066  | -0.926 | 0.566  | Dimethyl anthranilate                                    | Aromatic               | 0                  | I                       |
| -0.482 | -0.461 | -0.331 | 4-acetylbenzoic                                          | Aromatic               | 0                  | I                       |
| 1.124  | -1.714 | 0.565  | Delta-amorphene                                          | Sesquiterpenoids       | 0                  | I                       |
| 1.783  | -1.85  | 0.679  | ()-Cuparene                                              | Sesquiterpenoids       | 0                  | I                       |
| 1.66   | -1.989 | 0.688  | ()-Ledene                                                | Sesquiterpenoids       | 0                  | I                       |
| 1.896  | -2.042 | 0.617  | Germacrene A                                             | Sesquiterpenoids       | 0                  | I                       |
| 1.197  | -1.263 | 0.462  | (R)-p-Menth-1-en-4-ol                                    | Monoterpenoids         | 0                  | I                       |
| 1.603  | -1.216 | 0.537  | Alpha-thujene                                            | Monoterpenoids         | 0                  | I                       |
| 1.293  | -1.04  | 0.272  | 2-(2-butyryl)-cyclohexanone                              | Monoterpenoids         | 0                  | I                       |
| -2.005 | 3.894  | 0.212  | Hesperidin                                               | Flavone glycosides     | 3                  | II                      |
| -1.55  | 1.72   | -1.934 | Neohesperdin                                             | Flavone glycosides     | 3                  | II                      |
| -1.392 | 1.657  | -2.046 | Naringin                                                 | Flavone glycosides     | 3                  | II                      |
| 0.116  | 2.89   | 0.107  | Neohesperidin                                            | Flavone glycosides     | 3                  | II                      |
| 4.185  | 2      | 0.568  | Heptamethoxyflavone                                      | Polymethoxy flavone    | 2                  | III                     |
| 3.715  | 0.115  | -1.594 | Citromitin                                               | Polymethoxy flavone    | 2                  | III                     |
| 1.649  | 0.397  | 2.32   | Sinensetin                                               | Polymethoxy flavone    | 2                  | III                     |
| 4.685  | -2.064 | 1.205  | Diisobutyl phthalate                                     | Aromatic               | 2                  | III                     |
| 2.247  | -1.463 | 0.764  | Diethyl phthalate                                        | Aromatic               | 2                  | III                     |
| 1.93   | -1.419 | 0.707  | (L)-alpha-Terpineol                                      | Monoterpenoids         | 2                  | III                     |
| 2.835  | -2.009 | 0.824  | (-)-alpha-Pinene                                         | Monoterpenoids         | 2                  | III                     |
| 2.139  | -1.534 | 0.808  | ()-2-Carene                                              | Monoterpenoids         | 2                  | III                     |
| 4.368  | -1.343 | 1.036  | (R)-linalool                                             | Monoterpenoids         | 2                  | III                     |
| 5.364  | -1.681 | 1.485  | Beta-Ocimene                                             | Monoterpenoids         | 2                  | III                     |
| 1.831  | -1.299 | 0.681  | (-)-Sabinene                                             | Monoterpenoids         | 2                  | III                     |
| 1.231  | -1.323 | 0.424  | L-4-terpineol                                            | Monoterpenoids         | 2                  | III                     |
| 2.008  | -1.222 | 0.618  | Beta-terpineol                                           | Monoterpenoids         | 2                  | III                     |
| 3.917  | -1.339 | 0.859  | 22410-74-8                                               | Monoterpenoids         | 2                  | III                     |
| 4.655  | -1.62  | 1.174  | Neral                                                    | Fatty                  | 2                  | III                     |
| 5.417  | -1.729 | 1.517  | cis-beta-Ocimene                                         | Fatty                  | 2                  | III                     |
| 4.976  | -1.778 | 1.343  | 3-decyn-2-ol                                             | Fatty                  | 2                  | III                     |
| 5.343  | -1.913 | 1.495  | cis-2,6-Dimethyl-2,6-octadiene                           | Fatty                  | 2                  | III                     |
| 4.811  | 1.01   | 0.921  | Sitosterol                                               | Others                 | 2                  | III                     |
| 3.371  | -1.861 | 0.777  | Neryl acetate                                            | Others                 | 2                  | III                     |
| 5.443  | -1.565 | 1.375  | (2S)-2-ethoxypentane                                     | Others                 | 2                  | III                     |

|       |        |       |                                |                |   |     |
|-------|--------|-------|--------------------------------|----------------|---|-----|
| 4.812 | -1.118 | 1.347 | Eufin                          | Others         | 2 | III |
| 6.728 | -2.131 | 1.931 | 2,5,5-trimethylhepta-1,6-diene | Monoterpenoids | 1 | IV  |
| 9.901 | -1.981 | 2.444 | Undecanal                      | Fatty          | 1 | IV  |
| 9.14  | -2.162 | 2.109 | lauric acid                    | Fatty          | 1 | IV  |
| 6.438 | -1.951 | 1.458 | Octanal                        | Fatty          | 1 | IV  |
| 8.471 | -2.354 | 1.515 | Stearic acid                   | Fatty          | 1 | IV  |
| 9.223 | -2.851 | 1.734 | Henicosane                     | Fatty          | 1 | IV  |
| 6.669 | -2.106 | 1.821 | alpha-Ocimene                  | Fatty          | 1 | IV  |
| 8.569 | -2.787 | 2.069 | Farnesane                      | Fatty          | 1 | IV  |
| 9.944 | -1.907 | 2.54  | 1-Undecyne                     | Fatty          | 1 | IV  |
| 9.874 | -2.039 | 2.503 | Dodec-2-enal                   | Fatty          | 1 | IV  |
| 9.896 | -1.896 | 2.536 | 1-Decanol                      | Fatty          | 1 | IV  |
| 7.326 | -2.165 | 1.756 | Alpha-sinensal                 | Fatty          | 1 | IV  |
| 8.518 | -2.55  | 1.956 | 2,6,11-trimethyldodecane       | Fatty          | 1 | IV  |
| 8.439 | -2.02  | 2.042 | 6-hepten-1-ol                  | Fatty          | 1 | IV  |
| 9.507 | -2.499 | 2.114 | Undecyl acetate                | Fatty          | 1 | IV  |
| 8.125 | -2.503 | 1.864 | (+)-Citronellyl butyrate       | Others         | 1 | IV  |
| 6.565 | -1.679 | 1.882 | Isoprenol                      | Others         | 1 | IV  |

Table S2 Physiochemical properties of compounds included in Cluster I

| Name                                                     | Oral<br>Bioavailability | MW     | AlogP or<br>logP | caco2 | BBB   |
|----------------------------------------------------------|-------------------------|--------|------------------|-------|-------|
| Naringenin                                               | 59.29                   | 272.27 | 2.30             | 0.28  | -0.37 |
| 5,7-dihydroxy-2-(3-hydroxy-4-methoxyphenyl)chroman-4-one | 47.74                   | 302.30 | 2.28             | 0.28  | -0.30 |
| Tangeretin                                               | 21.38                   | 372.40 | 3.06             | 1.23  | 0.09  |
| Nobiletin                                                | 61.67                   | 402.43 | 3.04             | 1.05  | -0.08 |
| Carvacrol                                                | 46.69                   | 136.26 | 2.87             | 1.89  | 2.27  |
| Vanillin                                                 | 52.00                   | 152.16 | 1.31             | 0.68  | 0.41  |
| Caffeic acid                                             | 28.66                   | 164.17 | 1.17             | 0.33  | -0.17 |
| Isovanillic                                              | 39.42                   | 168.16 | 1.15             | 0.47  | 0.38  |
| Antioxidant No. 33                                       | 26.74                   | 206.36 | 4.36             | 1.68  | 1.81  |
| p-Cymen-8-ol                                             | 32.26                   | 150.24 | 2.29             | 1.33  | 1.35  |
| Dimethyl anthranilate                                    | 65.87                   | 165.21 | 1.49             | 1.35  | 1.29  |
| 4-acetylbenzoic                                          | 28.66                   | 164.17 | 1.17             | 0.33  | -0.17 |
| Delta-amorphene                                          | 17.95                   | 204.39 | 4.94             | 1.85  | 1.99  |
| ()-Cuparene                                              | 38.26                   | 202.37 | 4.72             | 1.88  | 2.15  |
| ()-Ledene                                                | 51.84                   | 204.39 | 4.36             | 1.86  | 2.16  |
| Germacrene A                                             | 19.21                   | 204.39 | 5.33             | 1.88  | 2.11  |
| (R)-p-Menth-1-en-4-ol                                    | 32.16                   | 154.28 | 2.55             | 1.33  | 1.52  |
| Alpha-thujene                                            | 46.25                   | 136.26 | 2.87             | 1.85  | 2.30  |
| 2-(2-butynyl)-cyclohexanone                              | 47.78                   | 150.24 | 2.68             | 1.44  | 1.48  |

Table S3 Compound identified in HPLC/MS/MS analysis

| No. | t <sub>R</sub><br>(min) | Formula                                         | [M+H]    |             |                                                                                        | [M-H]    |             |                                                 | Compound                        | Ref | Peak areas |       |       | Ab. in<br>EtOAc |
|-----|-------------------------|-------------------------------------------------|----------|-------------|----------------------------------------------------------------------------------------|----------|-------------|-------------------------------------------------|---------------------------------|-----|------------|-------|-------|-----------------|
|     |                         |                                                 | Observed | Theoretical | Fragments                                                                              | Observed | Theoretical | Fragments                                       |                                 |     | EtOAc      | EtOH  | Ratio |                 |
| 1   | 3.11                    | C <sub>9</sub> H <sub>7</sub> O <sub>4</sub>    |          |             |                                                                                        | 179.0343 | 179.0344    | 135.045,<br>134.0367,<br>117.0499,<br>90.9981   | caffeic acid                    | [1] | 16352      | N.D   | >10   | ↑               |
| 2   | 3.36                    | C <sub>27</sub> H <sub>30</sub> O <sub>15</sub> | 595.1669 | 595.1663    |                                                                                        | 593.1509 | 593.1466    | 503.1183,<br>473.1080,<br>383.0736,<br>353.0656 | vicenin-2                       | [2] | N.D        | 23599 | <0.1  | ↓               |
| 3   | 3.86                    | C <sub>28</sub> H <sub>32</sub> O <sub>16</sub> |          |             |                                                                                        | 623.1619 | 623.1612    | 533.1282,<br>503.1191,<br>413.0872,<br>383.0768 | stellarin-2                     | [2] | 3757       | 29986 | 0.06  | ↓               |
| 4   | 5.00                    | C <sub>10</sub> H <sub>10</sub> O <sub>4</sub>  |          |             |                                                                                        | 193.0502 | 193.0501    | 178.0263,<br>134.0363,<br>106.0414              | ferulic acid                    | [2] | 24541      | 5329  | 2.07  | ↑               |
| 5   | 5.50                    | C <sub>22</sub> H <sub>22</sub> O <sub>11</sub> | 463.1246 | 463.124     | 379.0739,<br>313.0703,<br>343.0815,<br>367.0799,<br>353.1032,<br>409.0940,<br>427.1033 | 461.1079 | 481.1084    | 371.0756,<br>341.0656,<br>298.0471              | diosmetin-<br>8-C-<br>glucoside | [2] | 25980      | 28010 | 0.42  | ↔               |
| 6   | 5.90                    | C <sub>27</sub> H <sub>31</sub> O <sub>14</sub> |          |             |                                                                                        | 579.1718 | 579.1714    | 271.0606,<br>151.0024                           | naringin                        | [2] | 5897       | 26255 | 0.10  | ↓               |

|    |       |                                                 |          |          |                                                 |          |          |                                                              |                                            |     |        |        |       |   |
|----|-------|-------------------------------------------------|----------|----------|-------------------------------------------------|----------|----------|--------------------------------------------------------------|--------------------------------------------|-----|--------|--------|-------|---|
| 7  | 6.47  | C <sub>28</sub> H <sub>34</sub> O <sub>15</sub> |          |          |                                                 | 609.1827 | 609.1819 | 301.0716,<br>257.0806,<br>242.0570,<br>199.0389,<br>151.0031 | neohesperidin                              | [2] | 362320 | 477320 | 0.34  | ↓ |
| 8  | 7.84  | C <sub>29</sub> H <sub>32</sub> O <sub>16</sub> | 637.1763 | 637.1769 | 389.1224,<br>374.1027,<br>359.0673              |          |          |                                                              | hexamethoxyflavone<br>malonyl<br>glucoside | [2] | 1549   | 3930   | 0.18  | ↓ |
| 9  | 8.33  | C <sub>26</sub> H <sub>30</sub> O <sub>10</sub> |          |          |                                                 | 501.1771 | 51.1761  | N.D                                                          | shihulimonin                               | [2] | 150447 | 5549   | 12.22 | ↑ |
| 10 | 8.56  | C <sub>26</sub> H <sub>30</sub> O <sub>10</sub> |          |          |                                                 | 501.1759 | 51.1761  | N.D                                                          | limonexic acid                             | [2] | 69931  | 13498  | 2.33  | ↑ |
| 11 | 8.85  | C <sub>18</sub> H <sub>16</sub> O <sub>6</sub>  | 329.1031 | 329.1025 | 314.0789,<br>299.0559                           |          |          |                                                              | hydroxy-trimethoxy<br>flavone              | [2] | 16869  | 3612   | 2.10  | ↑ |
| 12 | 10.21 | C <sub>16</sub> H <sub>14</sub> O <sub>6</sub>  |          |          |                                                 | 307.0712 | 307.0712 | 286.0480,<br>242.0578,<br>199.0389,<br>164.0098              | hesperetin                                 | [2] | 72817  | N.D    | >10   | ↑ |
| 13 | 11.35 | C <sub>20</sub> H <sub>20</sub> O <sub>8</sub>  | 389.1238 | 389.1236 | 373.1292,<br>358.1047,<br>343.0821,<br>329.1039 |          |          |                                                              | isosinensetin                              | [2] | 348509 | 9650   | 16.27 | ↑ |
| 14 | 11.38 | C <sub>19</sub> H <sub>18</sub> O <sub>7</sub>  |          |          |                                                 | 357.0979 | 357.0974 | N.D                                                          | 5-desmethylinensetin                       | [2] | 121394 | 18336  | 2.98  | ↔ |

|    |       |                                                |          |          |                                                              |          |          |                                                 |                                      |     |         |         |      |   |
|----|-------|------------------------------------------------|----------|----------|--------------------------------------------------------------|----------|----------|-------------------------------------------------|--------------------------------------|-----|---------|---------|------|---|
| 15 | 11.80 | C <sub>20</sub> H <sub>20</sub> O <sub>8</sub> |          |          |                                                              | 387.1076 | 387.108  | 372.0842,<br>357.0605,<br>342.0359,<br>329.0667 | umuhenger<br>in                      | [2] | 36866   | 3435    | 4.84 | ↑ |
| 16 | 12.89 | C <sub>20</sub> H <sub>20</sub> O <sub>8</sub> | 389.1238 | 389.1236 | 373.1288,<br>357.0967,<br>343.0818,<br>329.1026,<br>312.1000 |          |          |                                                 | sinensetin                           | [2] | 459971  | 122211  | 1.70 | ↔ |
| 17 | 13.32 | C <sub>19</sub> H <sub>18</sub> O <sub>6</sub> | 343.1187 | 343.1182 | 328.0945,<br>313.0716,<br>299.0930,<br>285.0755              |          |          |                                                 | 5,6,7,4'-<br>tetrametho<br>xyflavone | [2] | 567831  | 151794  | 1.69 | ↔ |
| 18 | 14.67 | C <sub>18</sub> H <sub>16</sub> O <sub>7</sub> |          |          |                                                              | 343.082  | 343.0818 | 343.0814,<br>328.0580,<br>313.0353,<br>298.0108 | xanthomicr<br>ol                     | [2] | 75723   | 7386    | 4.62 | ↑ |
| 19 | 14.98 | C <sub>20</sub> H <sub>20</sub> O <sub>7</sub> | 403.1394 | 403.1393 | 373.0926,<br>355.0819,<br>327.0871,<br>342.1102              |          |          |                                                 | nobiletin                            | [2] | 2486978 | 1367362 | 0.82 | ↑ |
| 20 | 15.23 | C <sub>19</sub> H <sub>18</sub> O <sub>6</sub> | 343.1192 | 343.1182 | 328.0949,<br>313.0722,<br>310.0846,<br>299.0930,<br>282.0896 |          |          |                                                 | 5,6,7,4'-<br>tetrametho<br>xyflavone | [2] | 2705519 | 1360418 | 0.90 | ↔ |

|                                   |       |                                                |          |          |                                                              |         |          |                                    |                                                     |     |          |          |      |   |
|-----------------------------------|-------|------------------------------------------------|----------|----------|--------------------------------------------------------------|---------|----------|------------------------------------|-----------------------------------------------------|-----|----------|----------|------|---|
| 21                                | 15.37 | C <sub>19</sub> H <sub>18</sub> O <sub>8</sub> |          |          |                                                              | 373.093 | 373.0923 | 343.0450,<br>358.0684,<br>328.0208 | 5,6-Dihydroxy-<br>7,8,3',4'-<br>tetramethoxyflavone | [3] | 193235   | 28354    | 3.07 | ↑ |
| 22                                | 16.42 | C <sub>22</sub> H <sub>24</sub> O <sub>9</sub> | 433.1501 | 433.1499 | 418.1252,<br>403.1022,<br>385.0911,<br>357.0900              |         |          |                                    | 3-Methoxynobiletin                                  | [4] | 120279   | 15431    | 3.51 | ↑ |
| 23                                | 17.54 | C <sub>20</sub> H <sub>20</sub> O <sub>7</sub> | 373.1287 | 373.1287 | 343.0821,<br>358.1028,<br>325.0705,<br>297.0743              |         |          |                                    | tangeretin                                          | [2] | 2705519  | 1360418  | 0.90 | ↔ |
| 24                                | 19.29 | C <sub>20</sub> H <sub>20</sub> O <sub>8</sub> | 389.1248 | 389.1236 | 374.1002,<br>359.0775,<br>341.0666,<br>328.0948              |         |          |                                    | 5-Demethynobiletin                                  | [2] | 994658   | 179672   | 2.49 | ↑ |
| 25                                | 22.32 | C <sub>19</sub> H <sub>18</sub> O <sub>7</sub> | 359.1136 | 359.1131 | 359.1137,<br>344.0889,<br>329.0673,<br>311.0561,<br>298.0827 |         |          |                                    | Gardenin B                                          | [4] | 77581    | 5193     | 6.73 | ↑ |
| Peak Area of identified compounds |       |                                                |          |          |                                                              |         |          |                                    |                                                     |     | 1.16E+07 | 5.25E+06 |      |   |

Table S4 Results from re-docking

| Name    | PDBID | RMSD versus co-crystal ligand |
|---------|-------|-------------------------------|
| AKT1    | 4EJN  | 0.738                         |
| PI3K    | 3L54  | 0.952                         |
| JNK     | 3ELJ  | 0.722                         |
| PDE3A   | 7L29  | 2.089                         |
| NOS2    | 4NOS  | 0.327                         |
| NOS1    | 6CIC  | 1.534                         |
| SYK     | 1XBC  | 0.592                         |
| STAT1   | 1BF5  | Not applicable                |
| STAT3   | 1BG1  | Not applicable                |
| STAT5   | 1Y1U  | Not applicable                |
| cSRC    | 2BDF  | 1.797                         |
| PPARG   | 3GZ9  | 0.529                         |
| TLR4    | 3VQ1  | Not applicable                |
| MAPK14  | 1A9U  | 0.879                         |
| MTOR    | 4JT6  | 0.735                         |
| ITGAM   | 1IDO  | Not applicable                |
| JAK1    | 3EYG  | 0.306                         |
| JAK2    | 4D0X  | 0.628                         |
| JAK3    | 3LXK  | 0.972                         |
| IKK     | 4KIK  | 0.707                         |
| RAC1    | 5N6O  | 0.947                         |
| TYK2    | 4GIH  | 0.396                         |
| CSF1R   | 3LCO  | 0.653                         |
| Tubulin | 1SA0  | 1.835                         |
| COX2    | 6COX  | 0.853                         |

#### Reference

1. Wang, X.; Li, W.; Ma, X.; Chu, Y.; Li, S.; Guo, J.; Jia, Y.; Zhou, S.; Zhu, Y.; Liu, C. Simultaneous determination of caffeic acid and its major pharmacologically active metabolites in rat plasma by LC-MS/MS and its application in pharmacokinetic study. *Biomed Chromatogr.* 2015. 29(4). 552-559.
2. Zhang, J.; Wu, X.; Qiu, J.; Zhang, L.; Zhang, Y.; Qiu, X.; Huang, Z.; Xu, W. Comprehensive Comparison on the Chemical Profile of Guang Chen Pi at Different Ripeness Stages Using Untargeted and Pseudotargeted Metabolomics. *J Agr Food Chem.* 2020. 68(31). 8483-8495.
3. Xu, L.L.; Xu, J.J.; Zhong, K.R.; Shang, Z.P.; Wang, F.; Wang, R.F.; Zhang, L.; Zhang, J.Y.; Liu, B. Analysis of Non-Volatile Chemical Constituents of *Menthae Haplocalycis* Herba by Ultra-High Performance Liquid Chromatography-High Resolution Mass Spectrometry. *Molecules.* 2017. 22(10).
4. Tang, J.; Dunshea, F.R.; Suleria, H.A.R. LC-ESI-QTOF/MS Characterization of Phenolic Compounds from Medicinal Plants (Hops and Juniper Berries) and Their Antioxidant Activity. *Foods.* 2019. 9(1).
